# Supplementary material for: Random plasma glucose predicts the diagnosis of diabetes
Source: PubMed Central journal article supplement (PMC6641200; doi:10.1371/journal.pone.0219964), 2019-07-19
Supplement: pone.0219964.s002.pdf [file pone.0219964.s002.pdf]

**S2 Table: Patient characteristics by number of available RPGs in baseline year**

|                                           | Number of RPG measurements in baseline year |                  |                  | p-value<br>(compared<br>to $\geq 3$ ) |
|-------------------------------------------|---------------------------------------------|------------------|------------------|---------------------------------------|
|                                           | $\geq 1$                                    | $\geq 2$         | $\geq 3$         |                                       |
| <b>n</b>                                  | 1,534,064                                   | 1,410,505        | 942,446          |                                       |
| <b>Age (years)</b>                        | 63 $\pm$ 13                                 | 63 $\pm$ 13      | 63 $\pm$ 12      | <0.001                                |
| <b>Male sex (%)</b>                       | 95.8%                                       | 95.9%            | 96.1%            | <0.001                                |
| <b>Race (%)</b>                           |                                             |                  |                  |                                       |
| <b>White</b>                              | 83.8%                                       | 83.8%            | 82.7%            | <0.001                                |
| <b>Black</b>                              | 13.4%                                       | 13.6%            | 14.9%            | <0.001                                |
| <b>Other</b>                              | 2.7%                                        | 2.6%             | 2.4%             | <0.001                                |
| <b>Ethnicity (%)</b>                      |                                             |                  |                  |                                       |
| <b>NonHispanic/Unknown</b>                | 95.7%                                       | 95.6%            | 95.1%            | <0.001                                |
| <b>Hispanic/Latino</b>                    | 4.3%                                        | 4.4%             | 4.9%             | <0.001                                |
| <b>BMI (kg/m<sup>2</sup>)</b>             | 28.7 $\pm$ 5.2                              | 28.7 $\pm$ 5.2   | 28.9 $\pm$ 5.4   | <0.001                                |
| <b>Systolic BP (mmHg)</b>                 | 133.9 $\pm$ 18.1                            | 134.0 $\pm$ 18.1 | 134.6 $\pm$ 18.6 | <0.001                                |
| <b>Non-HDL Chol (mg/dl)</b>               | 141.4 $\pm$ 39.0                            | 141.2 $\pm$ 38.9 | 141.5 $\pm$ 39.8 | <0.001                                |
| <b>RPG glucose (mg/dl)</b>                | 103.3 $\pm$ 15.2                            | 103.6 $\pm$ 15.1 | 106 $\pm$ 16     | <0.001                                |
| <b>Smoking (past/current) (%)</b>         | 79.9%                                       | 80.2%            | 81.3%            | <0.001                                |
| <b>CVD, preexisting (%)</b>               | 33.4%                                       | 34.6%            | 37.5%            | <0.001                                |
| <b>Elixhauser Index (median (Q1, Q3))</b> | -1 (-5, 2)                                  | -1 (-5, 2)       | -1 (-5, 3)       | <0.001                                |
| <b>Average baseline year</b>              | 2004.6 $\pm$ 1.7                            | 2004.5 $\pm$ 1.7 | 2004.4 $\pm$ 1.7 | <0.001                                |
