# Supplementary material for: Random plasma glucose predicts the diagnosis of diabetes
Source: PubMed Central journal article supplement (PMC6641200; doi:10.1371/journal.pone.0219964), 2019-07-19
Supplement: pone.0219964.s003.pdf [file pone.0219964.s003.pdf]

**S3 Table: Percentile distribution of median RPG levels at baseline and 1 year prior, stratified by diabetes status at end of followup period**

| Percentile | Median RPG,<br>1 year before baseline to baseline year |                      |
|------------|--------------------------------------------------------|----------------------|
|            | Non-diabetes<br>n=847,847                              | Diabetes<br>n=94,599 |
| 5%         | 83                                                     | 91                   |
| 10%        | 87                                                     | 96                   |
| 25%        | 93                                                     | 103                  |
| 50%        | 101                                                    | 112                  |
| 75%        | 108                                                    | 122                  |
| 90%        | 116                                                    | 135                  |
| 95%        | 123                                                    | 145                  |
