# Supplementary material for: Random plasma glucose predicts the diagnosis of diabetes
Source: PubMed Central journal article supplement (PMC6641200; doi:10.1371/journal.pone.0219964), 2019-07-19
Supplement: pone.0219964.s004.pdf [file pone.0219964.s004.pdf]

**S4 Table. ROCs and Integrated Discrimination Improvement (IDI) for prediction of diabetes at years 1, 3, and 5, stratified by sex**

|                                                                 |                                      | Models                                                          | Year 1                | Year 3                | Year 5                |
|-----------------------------------------------------------------|--------------------------------------|-----------------------------------------------------------------|-----------------------|-----------------------|-----------------------|
| <b>Males</b>                                                    | <b>ROC AUC (95<sup>th</sup>% CI)</b> | Model 1: Demographic factors <sup>a</sup>                       | 0.703 (0.700 , 0.705) | 0.702 (0.700 , 0.704) | 0.701 (0.699 , 0.703) |
|                                                                 |                                      | Model 2: Demographic + CVD factors <sup>†</sup>                 | 0.706 (0.703 , 0.708) | 0.703 (0.701 , 0.705) | 0.702 (0.700 , 0.703) |
|                                                                 |                                      | Model 3: RPG (maximum)                                          | 0.856 (0.854 , 0.858) | 0.821 (0.820 , 0.823) | 0.791 (0.790 , 0.793) |
|                                                                 |                                      | Model 4: RPG (average)                                          | 0.877 (0.876 , 0.879) | 0.836 (0.834 , 0.837) | 0.799 (0.798 , 0.801) |
|                                                                 |                                      | Model 5: RPG ( $\geq 2$ measures at/above threshold)            | 0.878 (0.876 , 0.880) | 0.839 (0.837 , 0.840) | 0.804 (0.802 , 0.805) |
|                                                                 |                                      | Model 6: Demographic + CVD + RPG (maximum)                      | 0.882 (0.880 , 0.883) | 0.855 (0.853 , 0.856) | 0.832 (0.830 , 0.833) |
|                                                                 |                                      | Model 7: Demographic + CVD + RPG (average)                      | 0.899 (0.898 , 0.901) | 0.869 (0.868 , 0.871) | 0.843 (0.842 , 0.845) |
|                                                                 |                                      | Model 8: Demographic + CVD + RPG ( $\geq 2$ at/above threshold) | 0.900 (0.898 , 0.901) | 0.872 (0.870 , 0.873) | 0.847 (0.846 , 0.848) |
|                                                                 | <b>IDI<sup>c</sup></b>               | Model 1: Demographic factors <sup>a</sup>                       | reference             | reference             | reference             |
|                                                                 |                                      | Model 2: Demographic + CVD factors <sup>b</sup>                 | 0.0007                | 0.0010                | 0.0013                |
| Model 3: Demographic + CVD + RPG ( $\geq 2$ at/above threshold) |                                      | 0.1874                                                          | 0.2438                | 0.2616                |                       |
| <b>Females</b>                                                  | <b>ROC AUC (95<sup>th</sup>% CI)</b> | Model 1: Demographic factors <sup>a</sup>                       | 0.746 (0.733 , 0.759) | 0.735 (0.725 , 0.745) | 0.730 (0.721 , 0.739) |
|                                                                 |                                      | Model 2: Demographic + CVD factors <sup>†</sup>                 | 0.751 (0.738 , 0.765) | 0.740 (0.729 , 0.750) | 0.734 (0.725 , 0.742) |
|                                                                 |                                      | Model 3: RPG (maximum)                                          | 0.859 (0.848 , 0.869) | 0.821 (0.812 , 0.830) | 0.789 (0.781 , 0.798) |
|                                                                 |                                      | Model 4: RPG (average)                                          | 0.862 (0.849 , 0.874) | 0.821 (0.811 , 0.831) | 0.780 (0.771 , 0.790) |
|                                                                 |                                      | Model 5: RPG ( $\geq 2$ measures at/above threshold)            | 0.871 (0.859 , 0.882) | 0.828 (0.818 , 0.838) | 0.787 (0.778 , 0.796) |
|                                                                 |                                      | Model 6: Demographic + CVD + RPG (maximum)                      | 0.890 (0.880 , 0.899) | 0.861 (0.853 , 0.869) | 0.839 (0.832 , 0.846) |
|                                                                 |                                      | Model 7: Demographic + CVD + RPG (average)                      | 0.898 (0.888 , 0.908) | 0.868 (0.860 , 0.877) | 0.842 (0.835 , 0.850) |
|                                                                 |                                      | Model 8: Demographic + CVD + RPG ( $\geq 2$ at/above threshold) | 0.905 (0.896 , 0.914) | 0.875 (0.867 , 0.883) | 0.848 (0.840 , 0.855) |
|                                                                 | <b>IDI<sup>c</sup></b>               | Model 1: Demographic factors <sup>a</sup>                       | reference             | reference             | reference             |
|                                                                 |                                      | Model 2: Demographic + CVD factors <sup>b</sup>                 | 0.0022                | 0.0034                | 0.0043                |
| Model 3: Demographic + CVD + RPG ( $\geq 2$ at/above threshold) |                                      | 0.1857                                                          | 0.2425                | 0.2611                |                       |

<sup>a</sup> Demographic factors (age, sex, BMI, race, ethnicity)

<sup>b</sup> CVD factors (systolic blood pressure, non-HDL-cholesterol, smoking)

<sup>c</sup>  $p < 0.0001$  for all IDI analyses comparing prediction performances using model 1 as reference within each year
