# Supplementary material for: Random plasma glucose predicts the diagnosis of diabetes
Source: PubMed Central journal article supplement (PMC6641200; doi:10.1371/journal.pone.0219964), 2019-07-19
Supplement: pone.0219964.s005.pdf [file pone.0219964.s005.pdf]

**S5 Table: Sensitivity, sensitivity, specificity, and positive and negative predictive values for different cutoffs for at least 2 RPGs at/above a cutoff to predict a diagnosis of diabetes within 1, 3, and 5 years, stratified by sex**

| >=2<br>measures<br>at/above<br>RPG<br>threshold<br>(mg/dl) | n      | %    | Year 1            |                   |                  |                  | Year 3            |                   |                  |                  | Year 5            |                   |                  |                  |
|------------------------------------------------------------|--------|------|-------------------|-------------------|------------------|------------------|-------------------|-------------------|------------------|------------------|-------------------|-------------------|------------------|------------------|
|                                                            |        |      | SENS <sub>a</sub> | SPEC <sub>b</sub> | PPV <sub>c</sub> | NPV <sub>d</sub> | SENS <sub>a</sub> | SPEC <sub>b</sub> | PPV <sub>c</sub> | NPV <sub>d</sub> | SENS <sub>a</sub> | SPEC <sub>b</sub> | PPV <sub>c</sub> | NPV <sub>d</sub> |
| <b>Male</b>                                                |        |      |                   |                   |                  |                  |                   |                   |                  |                  |                   |                   |                  |                  |
| 110                                                        | 340038 | 11.1 | 92.2%             | 64.9%             | 10.6%            | 99.5%            | 87.1%             | 66.4%             | 17.3%            | 98.5%            | 82.0%             | 67.4%             | 22.1%            | 97.1%            |
| 115                                                        | 239270 | 7.9  | 86.7%             | 76.3%             | 14.2%            | 99.2%            | 78.9%             | 77.8%             | 22.3%            | 97.9%            | 71.9%             | 78.7%             | 27.5%            | 96.1%            |
| 120                                                        | 168119 | 9.4  | 79.8%             | 84.2%             | 18.6%            | 98.9%            | 69.2%             | 85.5%             | 27.9%            | 97.2%            | 60.9%             | 86.2%             | 33.2%            | 95.1%            |
| 130                                                        | 83233  | 4.4  | 58.9%             | 93.1%             | 27.7%            | 98.0%            | 46.6%             | 93.8%             | 37.9%            | 95.6%            | 39.0%             | 94.2%             | 42.9%            | 93.2%            |
| 140                                                        | 42996  | 2.1  | 38.5%             | 96.8%             | 35.0%            | 97.2%            | 29.2%             | 97.2%             | 46.0%            | 94.4%            | 23.8%             | 97.4%             | 50.8%            | 91.9%            |
| 150                                                        | 23873  | 2.6  | 25.5%             | 98.4%             | 41.9%            | 96.7%            | 19.0%             | 98.7%             | 53.9%            | 93.8%            | 15.2%             | 98.8%             | 58.5%            | 91.2%            |
| <b>Female</b>                                              |        |      |                   |                   |                  |                  |                   |                   |                  |                  |                   |                   |                  |                  |
| 110                                                        | 9319   | 7.7  | 86.5%             | 76.8%             | 10.5%            | 99.4%            | 79.7%             | 78.2%             | 18.3%            | 98.4%            | 72.6%             | 79.1%             | 23.5%            | 97.0%            |
| 115                                                        | 6470   | 5.5  | 80.1%             | 84.5%             | 14.1%            | 99.3%            | 70.3%             | 85.8%             | 23.2%            | 97.9%            | 61.5%             | 86.5%             | 28.7%            | 96.2%            |
| 120                                                        | 4416   | 6.2  | 71.2%             | 90.0%             | 18.3%            | 99.0%            | 59.9%             | 91.0%             | 29.0%            | 97.4%            | 50.8%             | 91.5%             | 34.7%            | 95.5%            |
| 130                                                        | 2113   | 2.8  | 51.5%             | 95.8%             | 27.7%            | 98.4%            | 38.0%             | 96.3%             | 38.4%            | 96.2%            | 30.3%             | 96.5%             | 43.3%            | 94.0%            |
| 140                                                        | 1063   | 1.3  | 33.3%             | 98.1%             | 35.7%            | 97.9%            | 22.7%             | 98.4%             | 45.7%            | 95.4%            | 18.0%             | 98.5%             | 51.1%            | 93.1%            |
| 150                                                        | 574    | 1.5  | 22.6%             | 99.1%             | 44.8%            | 97.6%            | 14.9%             | 99.3%             | 55.4%            | 95.0%            | 11.5%             | 99.3%             | 60.3%            | 92.7%            |

<sup>a</sup> SENS = sensitivity

<sup>b</sup> SPEC = specificity

<sup>c</sup> PPV = positive predictive value

<sup>d</sup> NPV = negative predictive value
