# Supplementary material for: Random plasma glucose predicts the diagnosis of diabetes
Source: PubMed Central journal article supplement (PMC6641200; doi:10.1371/journal.pone.0219964), 2019-07-19
Supplement: pone.0219964.s006.pdf [file pone.0219964.s006.pdf]

**S6 Table: Negative predictive values of RPG values <110 mg/dl for *not* being diagnosed with diabetes within 1, 3, and 5 years**

| Number of RPG values <110 mg/dl | n       | %     | Negative Predictive Value (NPV) for incident diabetes |        |        |
|---------------------------------|---------|-------|-------------------------------------------------------|--------|--------|
|                                 |         |       | Year 1                                                | Year 3 | Year 5 |
| 1                               | 230,612 | 24.5% | 98.1%                                                 | 96.0%  | 93.8%  |
| 2                               | 154,323 | 16.4% | 99.5%                                                 | 98.5%  | 97.1%  |
| 3 or more                       | 438,766 | 46.6% | 99.7%                                                 | 99.0%  | 97.9%  |

No differences observed when stratified by sex.
