# Supplementary material for: Random plasma glucose predicts the diagnosis of diabetes
Source: PubMed Central journal article supplement (PMC6641200; doi:10.1371/journal.pone.0219964), 2019-07-19
Supplement: pone.0219964.s007.pdf [file pone.0219964.s007.pdf]

**S7 Table: ROCs for prediction of diabetes by collection time of RPG**

| <b>RPG collection by time of day</b> | <b>n</b> | <b>ROC (95th% CI) to predict incident diabetes</b> |                      |                      |
|--------------------------------------|----------|----------------------------------------------------|----------------------|----------------------|
|                                      |          | <b>Year 1</b>                                      | <b>Year 3</b>        | <b>Year 5</b>        |
| Before 9 am                          | 287,330  | 0.892 (0.888, 0.895)                               | 0.865 (0.862, 0.868) | 0.838 (0.835, 0.841) |
| 9-11 am                              | 211,313  | 0.881 (0.875, 0.886)                               | 0.845 (0.839, 0.850) | 0.815 (0.809, 0.820) |
| 11-1 pm                              | 80,324   | 0.836 (0.819, 0.853)                               | 0.789 (0.775, 0.804) | 0.756 (0.742, 0.769) |
| 1-3 pm                               | 42,169   | 0.789 (0.762, 0.816)                               | 0.775 (0.755, 0.795) | 0.740 (0.722, 0.759) |
| 3-5 pm                               | 16,230   | 0.848 (0.812, 0.883)                               | 0.810 (0.779, 0.841) | 0.756 (0.726, 0.786) |
| After 5 pm                           | 15,814   | 0.821 (0.794, 0.849)                               | 0.788 (0.765, 0.810) | 0.759 (0.738, 0.779) |

Total n=653,180, only subjects having 2 out of 3 glucose measurements collected at the same time of day.

No differences observed when stratified by sex.
